# Supplementary figures and images for: Genomic Investigation of Methicillin-Resistant Staphylococcus aureus ST113 Strains Isolated from Tertiary Care Hospitals in Pakistan
Source: MDPI journal article supplement (doi:10.3390/antibiotics10091121), 2021-09-17

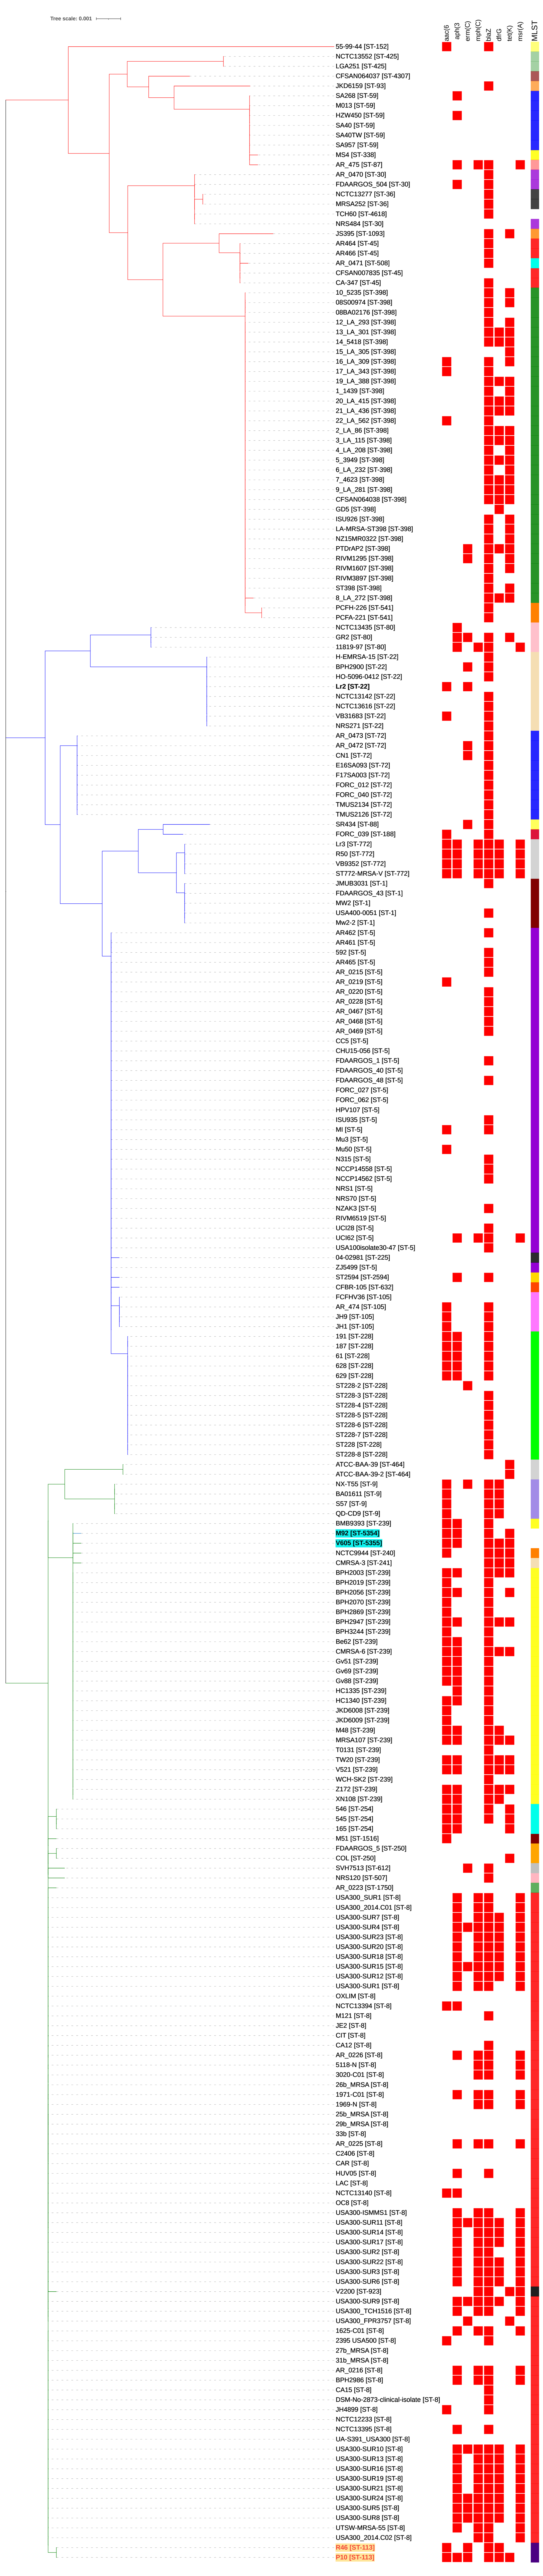

Supplement: s1 [file s1]
